# Supplementary material for: Benchmarking the Extent and Speed of Reperfusion: First Pass TICI 2c-3 Is a Preferred Endovascular Reperfusion Endpoint
Source: PubMed Central journal article supplement (PMC8144635; doi:10.3389/fneur.2021.669934), 2021-05-11
Supplement: Data_Sheet_2.pdf [file Data_Sheet_2.pdf]

## *ARISE II Investigators*

| First    | M.I. | Last       | Highest degree | Institution                                                | City, Country       | Function                                                |
|----------|------|------------|----------------|------------------------------------------------------------|---------------------|---------------------------------------------------------|
| René     |      | Chapot     | MD             | Alfried Krupp Krankenhaus                                  | Essen, Germany      | Steering Committee, Site PI                             |
| Ana      | P    | Narata     | MD             | CHRU Hôpitaux de Tours                                     | Tours, France       | Steering Committee, Site PI                             |
| Jonathan | A    | Grossberg  | MD             | Emory University School of Medicine                        | Atlanta, GA, USA    | Steering Committee, Site PI                             |
| Raul     | G    | Nogueira   | MD             | Emory University School of Medicine                        | Atlanta, GA, USA    | Steering Committee, Site Investigator                   |
| Tudor    | G    | Jovin      | MD             | University of Pittsburgh Medical Center                    | Pittsburgh, PA, USA | Steering Committee, Site Investigator                   |
| Adnan    | H    | Siddiqui   | MD, PhD        | University of Buffalo                                      | New York, NY, USA   | Steering Committee, Site PI                             |
| Mairsil  |      | Claffey    | -              | Cerenovus                                                  | Galway, Ireland     | Steering Committee                                      |
| Steven   | W    | Hetts      | MD             | University of California                                   | San Francisco, CA   | Data Safety Monitoring Board, Clinical Events Committee |
| Werner   |      | Hacke      | MD, PhD        | University of Heidelberg                                   | Heidelberg, Germany | Data Safety Monitoring Board                            |
| Brijesh  | P    | Mehta      | MD             | South Broward Hospital                                     | Hollywood, FL       | Data Safety Monitoring Board                            |
| Lofti    |      | Hacein-Bey | MD             | University of California Davis School of Medicine          | Sacramento, CA      | Data Safety Monitoring Board, Clinical Events Committee |
| Anthony  | W    | Kim        | MD             | Keck School of Medicine, University of Southern California | Los Angeles, CA     | Data Safety Monitoring Board, Clinical Events Committee |
| Alex     |      | Abou-Chebl | MD             | Baptist Health System                                      | Louisville, KY      | Data Safety Monitoring Board, Clinical Events Committee |
| Peter    |      | Shabe      | MSc            | Advance Research Associates, Inc                           | Santa Clara, CA     | Data Safety Monitoring Board, Biostatistician           |
| Ryan     | A    | Priest     | MD             | Oregon Health and Science University Hospital              | Portland, OR, USA   | Site Investigator                                       |

|           |   |                     |         |                                               |                   |                   |
|-----------|---|---------------------|---------|-----------------------------------------------|-------------------|-------------------|
| Gary      | M | Nesbit              | MD      | Oregon Health and Science University Hospital | Portland, OR, USA | Site Investigator |
| Wayne     | M | Clark               | MD      | Oregon Health and Science University Hospital | Portland, OR, USA | Site Investigator |
| Masahiro  |   | Horikawa            | MD      | Oregon Health and Science University Hospital | Portland, OR, USA | Site Investigator |
| David     | A | Hoak                | MD      | Oregon Health and Science University Hospital | Portland, OR, USA | Site Investigator |
| Bryan     | D | Petersen            | MD      | Oregon Health and Science University Hospital | Portland, OR, USA | Site Investigator |
| Noah      | C | Beadell             | MD      | Oregon Health and Science University Hospital | Portland, OR, USA | Site Investigator |
| Kory      | S | Herrick             | MD      | Oregon Health and Science University Hospital | Portland, OR, USA | Site Investigator |
| Corey     | R | White               | DO      | Oregon Health and Science University Hospital | Portland, OR, USA | Site Investigator |
| Michelle  | T | Stacey              | MD      | Oregon Health and Science University Hospital | Portland, OR, USA | Site Investigator |
| Sierra    | C | Ford                | DO      | Oregon Health and Science University Hospital | Portland, OR, USA | Site Investigator |
| Jesse     | J | Liu                 | MD      | Oregon Health and Science University Hospital | Portland, OR, USA | Site Investigator |
| Alejandro |   | Tomasello           | MD      | Hospital Vall d'Hebron                        | Barcelona, Spain  | Site Investigator |
| Carlos    | A | Molina              | MD, PhD | Hospital Vall d'Hebron                        | Barcelona, Spain  | Site Investigator |
| David     |   | Rodriguez-Luna      | MD, PhD | Hospital Vall d'Hebron                        | Barcelona, Spain  | Site Investigator |
| Sandra    |   | Boned-Riera         | MD      | Hospital Vall d'Hebron                        | Barcelona, Spain  | Site Investigator |
| Jorge     |   | Pagola              | MD, PhD | Hospital Vall d'Hebron                        | Barcelona, Spain  | Site Investigator |
| Marta     |   | Rubiera             | MD, PhD | Hospital Vall d'Hebron                        | Barcelona, Spain  | Site Investigator |
| Jesus     | M | Juega               | MD      | Hospital Vall d'Hebron                        | Barcelona, Spain  | Site Investigator |
| Noelia    |   | Rodriguez-Villatoro | MD      | Hospital Vall d'Hebron                        | Barcelona, Spain  | Site Investigator |
| Hannes    |   | Nordmeyer           | MD      | Alfried Krupp Krankenhaus                     | Essen, Germany    | Site Investigator |
| Michael   |   | Stauder             | -       | Alfried Krupp Krankenhaus                     | Essen, Germany    | Site Investigator |
| Christian | P | Stracke             | MD      | Alfried Krupp Krankenhaus                     | Essen, Germany    | Site Investigator |

|          |   |              |         |                                         |                     |                   |
|----------|---|--------------|---------|-----------------------------------------|---------------------|-------------------|
| Markus   |   | Hedder       | -       | Alfried Krupp Krankenhaus               | Essen, Germany      | Site Investigator |
| Denis    |   | Herbreteau   | MD, PhD | CHRU Hôpitaux de Tours                  | Tours, France       | Site Investigator |
| Richard  |   | Bibi         | MD      | CHRU Hôpitaux de Tours                  | Tours, France       | Site Investigator |
| Oliver   |   | Francois     | MD      | AZ Groeninge                            | Kortrijk, Belgium   | Site Investigator |
| D        |   | Pieters      | -       | AZ Groeninge                            | Kortrijk, Belgium   | Site Investigator |
| Tom      |   | Dewaele      | MD      | AZ Groeninge                            | Kortrijk, Belgium   | Site Investigator |
| Paul     |   | Bourgeois    | -       | AZ Groeninge                            | Kortrijk, Belgium   | Site Investigator |
| Frederik |   | Vanhee       | -       | AZ Groeninge                            | Kortrijk, Belgium   | Site Investigator |
| Patrick  |   | Vanderdouckt | -       | AZ Groeninge                            | Kortrijk, Belgium   | Site Investigator |
| Evelien  |   | Vancaester   | -       | AZ Groeninge                            | Kortrijk, Belgium   | Site Investigator |
| Tudor    | G | Jovin        | MD      | University of Pittsburgh Medical Center | Pittsburgh, PA, USA | Site Investigator |
| Brian    | T | Jankowitz    | MD      | University of Pittsburgh Medical Center | Pittsburgh, PA, USA | Site Investigator |
| Andrew   | F | Ducruet      | MD      | University of Pittsburgh Medical Center | Pittsburgh, PA, USA | Site Investigator |
| Amin     | N | Aghaebrahim  | MD      | University of Pittsburgh Medical Center | Pittsburgh, PA, USA | Site Investigator |
| Cynthia  | L | Kenmuir      | MD, PhD | University of Pittsburgh Medical Center | Pittsburgh, PA, USA | Site Investigator |
| Hazem    | M | Shoirah      | MD      | University of Pittsburgh Medical Center | Pittsburgh, PA, USA | Site Investigator |
| Bradley  | J | Molyneaux    | MD, PhD | University of Pittsburgh Medical Center | Pittsburgh, PA, USA | Site Investigator |
| Prasanna | K | Tadi         | MD      | University of Pittsburgh Medical Center | Pittsburgh, PA, USA | Site Investigator |
| Gena     | M | Walker       | MD      | University of Pittsburgh Medical Center | Pittsburgh, PA, USA | Site Investigator |
| Matthew  | T | Starr        | MD      | University of Pittsburgh Medical Center | Pittsburgh, PA, USA | Site Investigator |
| Diogo    | C | Haussen      | MD      | Emory University School of Medicine     | Atlanta, GA, USA    | Site Investigator |
| Michael  | R | Frankel      | MD      | Emory University School of Medicine     | Atlanta, GA, USA    | Site Investigator |

|           |   |            |         |                                                      |                   |                   |
|-----------|---|------------|---------|------------------------------------------------------|-------------------|-------------------|
| Nicolas   | A | Bianchi    | MD      | Emory University School of Medicine                  | Atlanta, GA, USA  | Site Investigator |
| Samir     | R | Belegaje   | MD      | Emory University School of Medicine                  | Atlanta, GA, USA  | Site Investigator |
| Nicole    | D | Mahdi      | MD      | Emory University School of Medicine                  | Atlanta, GA, USA  | Site Investigator |
| Sourabh   |   | Lahoti     | MD      | Emory University School of Medicine                  | Atlanta, GA, USA  | Site Investigator |
| Anna      | N | Katema     | DO      | Emory University School of Medicine                  | Atlanta, GA, USA  | Site Investigator |
| Melanie   | J | Winningham | MD      | Emory University School of Medicine                  | Atlanta, GA, USA  | Site Investigator |
| Aaron     | M | Anderson   | MD      | Emory University School of Medicine                  | Atlanta, GA, USA  | Site Investigator |
| Eugene    |   | Lin        | MD      | Mercy St. Vincent Medical Center                     | Toldo, OH, USA    | Site Investigator |
| Christian | H | Riedel     | MD      | Universitätsklinikum Schleswig-Holstein, Kiel Campus | Kiel, Germany     | Site PI           |
| Olav      |   | Jansen     | MD, PhD | Universitätsklinikum Schleswig-Holstein, Kiel Campus | Kiel, Germany     | Site Investigator |
| Fritz     |   | Wodarg     | MD      | Universitätsklinikum Schleswig-Holstein, Kiel Campus | Kiel, Germany     | Site Investigator |
| Naomi     |   | Larsen     | MD      | Universitätsklinikum Schleswig-Holstein, Kiel Campus | Kiel, Germany     | Site Investigator |
| Andreas   |   | Binder     | MD      | Universitätsklinikum Schleswig-Holstein, Kiel Campus | Kiel, Germany     | Site Investigator |
| Daniel    |   | Wiesen     | MSc     | Universitätsklinikum Schleswig-Holstein, Kiel Campus | Kiel, Germany     | Site Investigator |
| Kenneth   | V | Snyder     | MD, PhD | University of Buffalo                                | New York, NY, USA | Site Investigator |
| Elad      | I | Levy       | MD      | University of Buffalo                                | New York, NY, USA | Site Investigator |
| Jason     | M | Davies     | MD, PhD | University of Buffalo                                | New York, NY, USA | Site Investigator |

|            |   |                 |                                |                                                   |                   |                   |
|------------|---|-----------------|--------------------------------|---------------------------------------------------|-------------------|-------------------|
| Ashish     |   | Sonig           | MD                             | University of Buffalo                             | New York, NY, USA | Site Investigator |
| Leonardo   | N | Rangel-Castilla | MD                             | University of Buffalo                             | New York, NY, USA | Site Investigator |
| Ashkan     |   | Mowla           | MD                             | University of Buffalo                             | New York, NY, USA | Site Investigator |
| Hakeem     | J | Shakir          | MD                             | University of Buffalo                             | New York, NY, USA | Site Investigator |
| Vernard    | S | Fennel          | MD, MSc                        | University of Buffalo                             | New York, NY, USA | Site Investigator |
| Gursant    | S | Atwal           | MD                             | University of Buffalo                             | New York, NY, USA | Site Investigator |
| Sabareesh  | K | Natarajan       | MD, MSc                        | University of Buffalo                             | New York, NY, USA | Site Investigator |
| J          |   | Beecher         | -                              | University of Buffalo                             | New York, NY, USA | Site Investigator |
| John       |   | Thornton        | MB FFR<br>RCSI                 | Beaumont Hospital                                 | Dubline, Ireland  | Site PI           |
| Paul       |   | Brennan         | MRCPI<br>FRCR<br>FFRCSI<br>MSc | Beaumont Hospital                                 | Dubline, Ireland  | Site Investigator |
| Alan       |   | O'Hare          | MB BCh<br>BAO                  | Beaumont Hospital                                 | Dubline, Ireland  | Site Investigator |
| Hamed      |   | Asadi           | MD, PhD                        | Beaumont Hospital                                 | Dubline, Ireland  | Site Investigator |
| Ronald     | F | Budzik          | MD                             | Riverside Radiology and Interventional Associates | Columbus, USA     | Site PI           |
| N          |   | Voraco          | -                              | Riverside Radiology and Interventional Associates | Columbus, USA     | Site Investigator |
| Peter      | J | Pema            | MD                             | Riverside Radiology and Interventional Associates | Columbus, USA     | Site Investigator |
| Thomas     | M | Davis           | MD                             | Riverside Radiology and Interventional Associates | Columbus, USA     | Site Investigator |
| William    | J | Hicks           | MD                             | Riverside Radiology and Interventional Associates | Columbus, USA     | Site Investigator |
| Jennifer   | D | Mejilla         | DO                             | Riverside Radiology and Interventional Associates | Columbus, USA     | Site Investigator |
| Mohamed    | S | Teleb           | MD                             | Banner Desert Medical Center                      | AZ, USA           | Site PI           |
| Peter      | J | Sunenshine      | MD                             | Banner Desert Medical Center                      | AZ, USA           | Site PI           |
| Jacqueline | M | Carter          | MD                             | Banner Desert Medical Center                      | AZ, USA           | Site Investigator |

|           |   |                 |                               |                                                   |                   |                   |
|-----------|---|-----------------|-------------------------------|---------------------------------------------------|-------------------|-------------------|
| Christian | A | Taschner        | MD                            | Universitätsklinikum Freiburg                     | Freiburg, Germany | Site PI           |
| Stephan   |   | Meckel          | MD                            | Universitätsklinikum Freiburg                     | Freiburg, Germany | Site Investigator |
| Samer     |   | Elsheik         | MD                            | Universitätsklinikum Freiburg                     | Freiburg, Germany | Site Investigator |
| Horst     |   | Urbach          | MD                            | Universitätsklinikum Freiburg                     | Freiburg, Germany | Site Investigator |
| Christoph | A | Maurer          | MD,<br>FACS,<br>FRCS,<br>FEBS | Universitätsklinikum Freiburg                     | Freiburg, Germany | Site Investigator |
| Karl      |   | Egger           | MD                            | Universitätsklinikum Freiburg                     | Freiburg, Germany | Site Investigator |
| Wolf      | D | Nieson          | MD                            | Universitätsklinikum Freiburg                     | Freiburg, Germany | Site Investigator |
| Blaise    | W | Baxter          | MD                            | Erlanger Hospital                                 | Chattanooga, TN   | Site PI           |
| Steven    | D | Quarfordt       | MD                            | Erlanger Hospital                                 | Chattanooga, TN   | Site Investigator |
| Justin    | A | Calvert         | MD                            | Erlanger Hospital                                 | Chattanooga, TN   | Site Investigator |
| Harris    | E | Hawk            | MD                            | Erlanger Hospital                                 | Chattanooga, TN   | Site Investigator |
| Reza      |   | Malek           | MD, Msc                       | Good Samaritan Hospital / Regional Medical Center | San Jose, CA      | Site PI           |
| Arash     | M | Padidar         | MD                            | Good Samaritan Hospital / Regional Medical Center | San Jose, CA      | Site PI           |
| Ursula    |   | Kelly-Tolley    | RN                            | Good Samaritan Hospital / Regional Medical Center | San Jose, CA      | Site Investigator |
| A         |   | Gutierrez       | -                             | Good Samaritan Hospital / Regional Medical Center | San Jose, CA      | Site Investigator |
| Pasquale  |   | Mordasini       | MD, Msc                       | Inselspital, University Hospital Bern             | Bern, Switzerland | Site PI           |
| Rupashani |   | Balasubramaniam | -                             | Inselspital, University Hospital Bern             | Bern, Switzerland | Site Investigator |
| Jan       |   | Gralla          | MD                            | Inselspital, University Hospital Bern             | Bern, Switzerland | Site Investigator |

|         |   |            |              |                                         |                    |                   |
|---------|---|------------|--------------|-----------------------------------------|--------------------|-------------------|
| Urs     |   | Fischer    | MD           | Inselspital, University Hospital Bern   | Bern, Switzerland  | Site Investigator |
| Felix   |   | Zibold     | MD           | Inselspital, University Hospital Bern   | Bern, Switzerland  | Site Investigator |
| Eike    | I | Piechowiak | MD           | Inselspital, University Hospital Bern   | Bern, Switzerland  | Site Investigator |
| Reade   | A | DeLeacy    | MD           | Ichan School of Medicine at Mount Sinai | New York, USA      | Site PI           |
| Johanna | T | Fifi       | MD           | Ichan School of Medicine at Mount Sinai | New York, USA      | Site Investigator |
| Jay     |   | Mocco      | MD, Msc      | Ichan School of Medicine at Mount Sinai | New York, USA      | Site Investigator |
| Sidney  |   | Starkman   | MD           | UCLA Stroke Network                     | Los Angeles, CA    | Site PI           |
| Viktor  |   | Szeder     | MD, PhD, MSc | UCLA Stroke Network                     | Los Angeles, CA    | Site Investigator |
| Satoshi |   | Tateshima  | MD           | UCLA Stroke Network                     | Los Angeles, CA    | Site Investigator |
| Gary    | R | Duckwiler  | MD           | UCLA Stroke Network                     | Los Angeles, CA    | Site Investigator |
| May     |   | Nour       | MD, PhD      | UCLA Stroke Network                     | Los Angeles, CA    | Site Investigator |
| Xian    | N | Tang       | MD           | UCLA Stroke Network                     | Los Angeles, CA    | Site Investigator |
| Jason   | D | Hinman     | MD, PhD      | UCLA Stroke Network                     | Los Angeles, CA    | Site Investigator |
| Anita   |   | Tipirneni  | MD           | UCLA Stroke Network                     | Los Angeles, CA    | Site Investigator |
| Dileep  | R | Yavagal    | MD           | University of Miami / Jackson Memorial  | Miami, FL, USA     | Site PI           |
| S       |   | Suir       | -            | University of Miami / Jackson Memorial  | Miami, FL, USA     | Site Investigator |
| Justin  | M | Caplan     | MD           | University of Miami / Jackson Memorial  | Miami, FL, USA     | Site Investigator |
| P       |   | Kandewall  | -            | University of Miami / Jackson Memorial  | Miami, FL, USA     | Site Investigator |
| Eric    | C | Peterson   | MD           | University of Miami / Jackson Memorial  | Miami, FL, USA     | Site Investigator |
| Robert  | M | Starke     | MD           | University of Miami / Jackson Memorial  | Miami, FL, USA     | Site Investigator |
| Ajit    | S | Puri       | MD           | UMASS Memorial Medical                  | Worcester, MA, USA | Site PI           |

|           |   |           |         |                                       |                    |                   |
|-----------|---|-----------|---------|---------------------------------------|--------------------|-------------------|
| David     | E | Rex       | MD, PhD | UMASS Memorial Medical                | Worcester, MA, USA | Site Investigator |
| Francesco |   | Massari   | MD, PhD | UMASS Memorial Medical                | Worcester, MA, USA | Site Investigator |
| Ajay      | K | Wakhloo   | MD, PhD | UMASS Memorial Medical                | Worcester, MA, USA | Site Investigator |
| Juan      | D | Lozano    | MD      | UMASS Memorial Medical                | Worcester, MA, USA | Site Investigator |
| Katyucia  | D | Rodrigues | MD      | UMASS Memorial Medical                | Worcester, MA, USA | Site Investigator |
| Laurent   |   | Pierot    | MD, PhD | CHRU de Reims, Hôpital Maison Blanche | Reims, France      | Site PI           |
|           |   | Bouquigyn | -       | CHRU de Reims, Hôpital Maison Blanche | Reims, France      | Site Investigator |
| S         |   | Sebastien | -       | CHRU de Reims, Hôpital Maison Blanche | Reims, France      | Site Investigator |
| M         | G | Emmoinoli | -       | CHRU de Reims, Hôpital Maison Blanche | Reims, France      | Site Investigator |
